# Supplementary material for: Sequence Analysis and FISH Mapping of Four Satellite DNA Families among Cervidae
Source: MDPI journal article supplement (doi:10.3390/genes11050584), 2020-05-24
Supplement: s1 [file s1]

|            |                                                                         |
|------------|-------------------------------------------------------------------------|
| CEL_clone1 | GGCTGGCGGGAACAGCCGGCGAGAGTGCTTGCAAAGCGGCCTTTGGAGGCAGCCGGGGGAG           |
| CEL_clone2 | GGCTTATGGGAACAGCAGGCCAGAGTGCTTGCAAAGCGGCCTTTGGAGGCAGCCGGGGGAG           |
| CEL_clone3 | AGCTGGCGGGAACAGCCGGCGAGAGTGCTTGCAAAGCGGCCTTTGGAGGCAGCCGGGGGAG           |
| CEL_clone4 | GGCTGGCGGGAGCAGCCGGCGAGAGTGCTTGCAAAGCGGCCTTTGGAGGCAGCCGGGGGAG           |
| DDA_clone1 | GCCTGCTGGGAACAGTGGGAGGGAGTGCTTGCAAACCAGCCTTTGGAGGCAGCCGGGGGAG           |
| DDA_clone2 | GCCTGGCGGGAACAGCGGGCGGGAGTGCTTGCAAACCAGCCTTTGGAGGCAGCCGGGGGAG           |
| DDA_clone3 | AGCTGGCAGGAACAGCAGGCCGAGAGTGCTTGCAAACCAGCCTTTGGAGGCAGCCGGGGGAG          |
| DDA_clone4 | GCCTGGCGGGAACAGCGGCCGGGAGTG-TTGCAAACCAGCCTTTGGAGGCAGCCGGGGGAG           |
| REL_clone1 | AGCTGGCGGGAACAGCCGGCGAGAGTGCTTGCAAAGCGGCCTTTGGAGGCAGATAGGGAG            |
| REL_clone2 | GGCTGGCGGGAACAGCCGGAGAGAGTGCTTGCAAAGCGGCCTTTGGAGGCAGCCGGGGGAG           |
| REL_clone3 | GGCTGGCGGGAACAGCCGGCGAGAGTGCTCGCAAAGCGGCCTTTGGAGGCAGCCGGGGGAG           |
| REL_clone4 | GGCTGGCGGGAACAGCCGGCGAGAGTGCTTGCAAAGCGGCCTTTGGAGGCAGCCGGGGGAG           |
| CAL_clone1 | GGCTGGGGGGAACAGCCGGCGAGAGTGCTTGCAAAGCGGCCTTTGGAAGCAGCCGGGGGAG           |
| CAL_clone2 | GACTGGCGGGAACAGCCGGCGAGAGTGCTTGCAAAGCGGCCTTTGGAGGCAGCCGGGGGAG           |
| CAL_clone3 | GGCTGGCGGGAACAGCCGGCGAGAGTGCTCGCAAAGCGGCCTCTGGAGGCAGCCGGGGGAG           |
| CAL_clone4 | GGCTGGCGGGAACAGCCGGCGAGAGTGCTTGCAAAGCGGCCTTTGGAGGCAGCCGGGGGAG           |
| EDA_clone1 | GGCTGGCGGGAACAGCCGGCGAGAGTGCTTGCAAAGCGGCCTTTGGAGGCAGCCGGGGGAG           |
| EDA_clone2 | GGCTGGCGGGAACAGCCAGCGAGAGTGCTTGCAAAGCGGCCTTTGGAGGCAGCCGGGGGAG           |
| EDA_clone3 | GGCTGGTGGGAACAGCCGGCGAGAGTGCTTGCAAAGCGGCCTTTGGAGGCAGCCGGGGGAG           |
| EDA_clone4 | GGCTGGCGGGAACAGCCGGCGAGAGTGCTTGCAAAGCGGCCTTTGGAGGCAGCCGGGGGAG           |
| RTI_clone1 | AGCTGGCGGGAACAGCCGGCGAGAGTGCTTGCAAACCGGCCTTTGGAGGCAGCCGGGGGAG           |
| RTI_clone2 | GGCTGGTAGGAACAGCCGGCGAGAGTGCTTGCAAAGCGGCCTTTGGAGGCAGCCGGGGGAG           |
| RTI_clone3 | AGCTGGCCGGAACAGCCGGCGAGAGTGCTTGCAAAGCGGCCTTTGGAGTAGCCGGGGGAG            |
| RTI_clone4 | GGCTGGCGGGAACAGCCGGCGAGAGTGCTTGCAAAGCGGCCTTTGGAGGCAGCCGGGGGAG           |
|            | **      ***  ***          ***** * ***** * ***** * **      **      ***** |

|            |                                                               |
|------------|---------------------------------------------------------------|
| CCA_clone1 | CCGGTGAGAGTGCTTGCAAACCGGCCTTTGGAAGCAGCCGGGGAGGTCTTCCAGCGGGGAG |
| CCA_clone2 | CCGGCGAGAGTGCTTGCAAACCGGCCTTTGGAAGCAGCCGGGGAGGTCTTCCAGCGGGGAG |
| CCA_clone3 | CCGGCGAGAGTGCTTGCAAACCGGCCTTTGGAAGCAGCCGGGGAGGTCTTCCAGCGGGGAG |
| CCA_clone4 | CCGGCGAGAGTGCTTGCAAACCGGCCATTGGAAGCAGCCGGGGAGGTCTTCCAGCAGGAG  |
| RTA_clone1 | CCGGCCAGAGTGCTTGCAAACCGGGATTTCACGCAGGCGGGGAGGTCTTCCAGAGGGGAG  |
| RTA_clone2 | CCGGCCAGAGTGCTTGCAAACCGGGATTTCACGCAGGCGGGGAGGTCTTCCAGAGGGGAG  |
| RTA_clone3 | CCGGCCAGAGTGCTTCCAAACAGC-CTTGGAAGGAGCCGGGGAGGTCTTCCAGCGGGGAG  |
| RTA_clone4 | CCGGCCAGAGTGCTTGCAAACCGGGATTTCACGCAGGCGGGGAGGTCTTCCAGAGGGGAG  |
| OVI_clone1 | CCGGCCAGAGTGCTTCCCAAACGGCCTTTGGAGGCAGGTGGGGAGGTCTGCCGGAGGGGAG |
| OVI_clone2 | CCGGCCAGAGTGCTTCCCAAACGGCCTTTGGAGGCAGGCGGGGAGGTCTGCCGGAGAGAG  |
| OVI_clone3 | CCGGCCAGAGTGCTTCCAAACGGCCTTTGGAGGCAGGCGGGGAGGTCTGCCAGAGGGGAG  |
| OVI_clone4 | CCGGCCAGAGTGCTTCCCAAACGGCCTTTGGAGGCAGGCGGGGAGGTCTGCCCCAGGGGAG |
|            | ****  ***** * **      *      *** * ** ***** * *      ***      |

|            |                                                             |
|------------|-------------------------------------------------------------|
| MRE_clone1 | GGAGCAGTGTGCTCAGCTTGCGGAATCGCGGCCTCCCTCGGGGAGAGTGCTTGCAAAC  |
| MRE_clone2 | GGAGCAGGTGTGCTCAGCTTGCGGAATCGCGGCCTCCCTCGGGGAGAGTGCTTGCAAAC |
| MRE_clone3 | GAAGCAGAGTGC CGGCTTGCGGAAACGTGGGCTTTCCTCGGGTATAGTGCTTGCAAAC |
| MRE_clone4 | GGAGCAGTGTGCTCAGCTTGCGGAATCGCGGCCTCCCTCGGGGAGAGTGCTTGCAAAC  |
|            | * ***** ***** * ***** ***** ** ***** * ***** * ***** *****  |
