# Supplementary figures and images for: Sequence Analysis and FISH Mapping of Four Satellite DNA Families among Cervidae
Source: MDPI journal article supplement (doi:10.3390/genes11050584), 2020-05-24

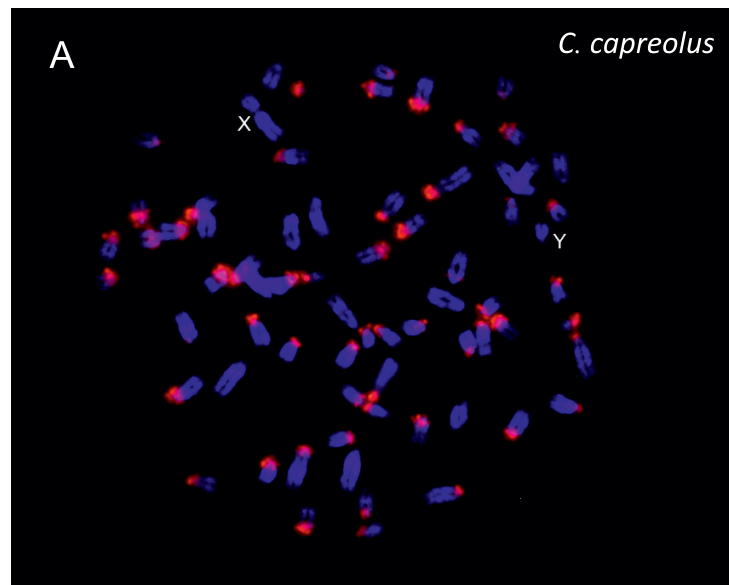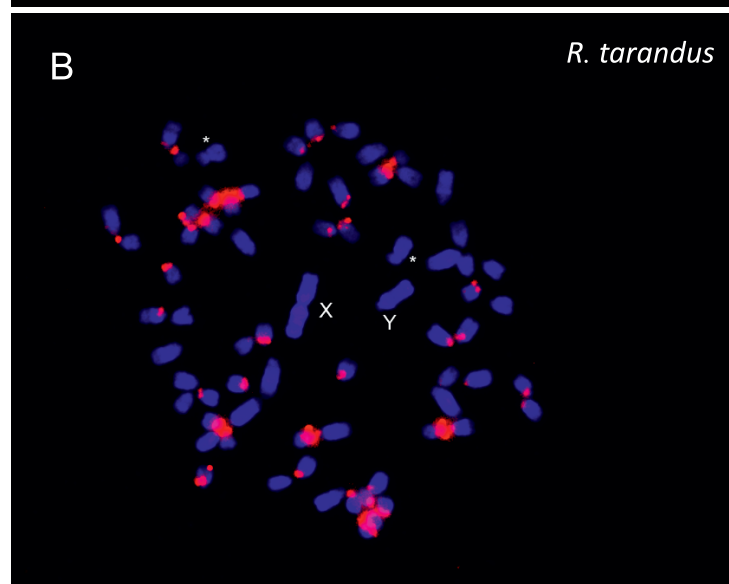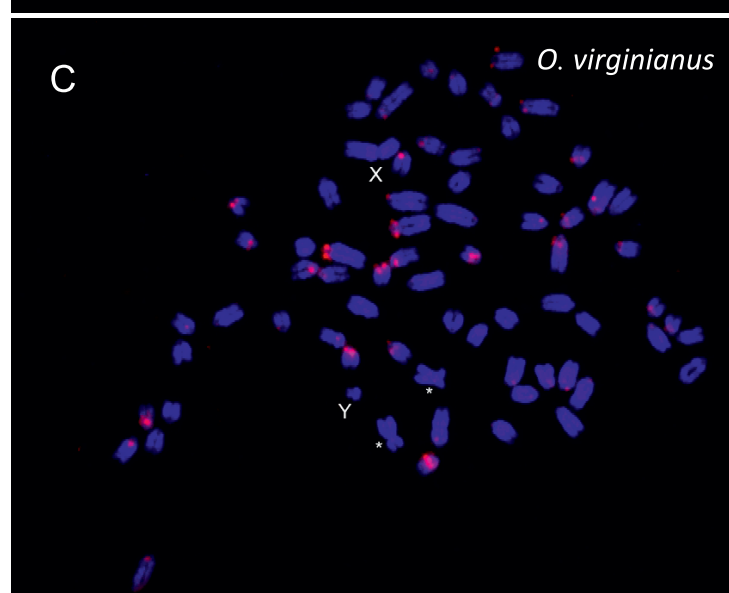

Supplement: s1 [file s1]

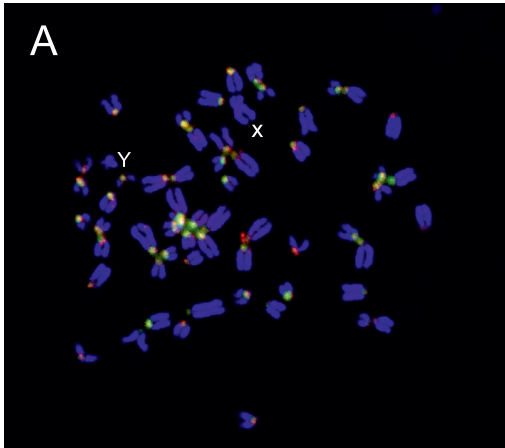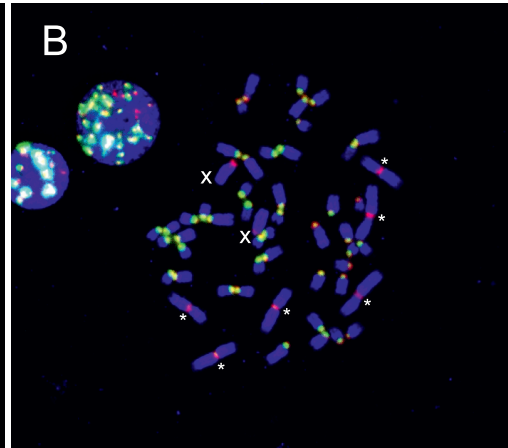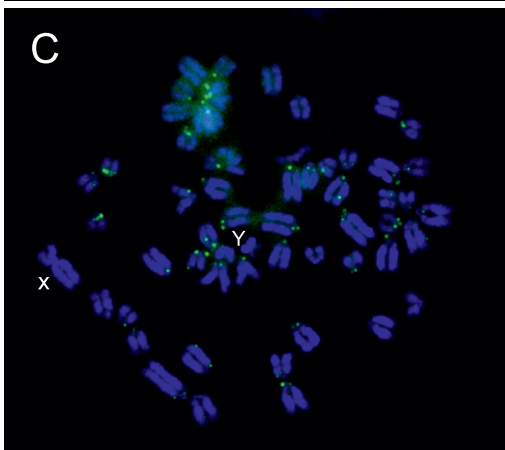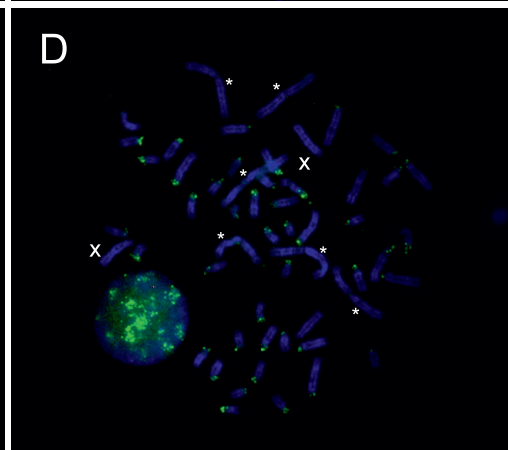

Supplement: s1 [file s1]

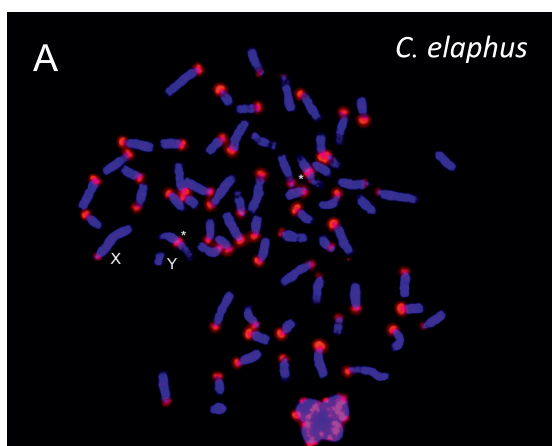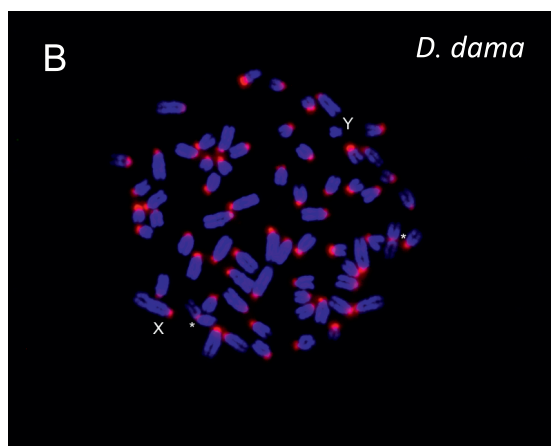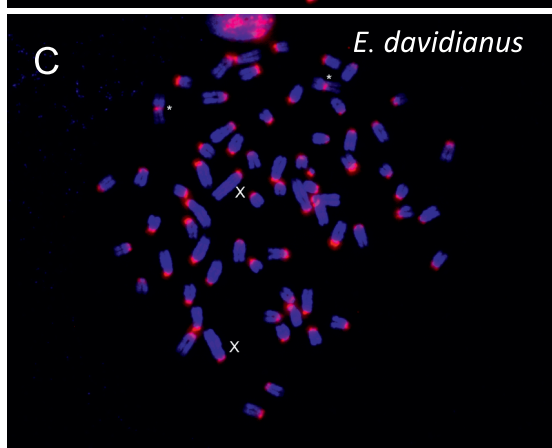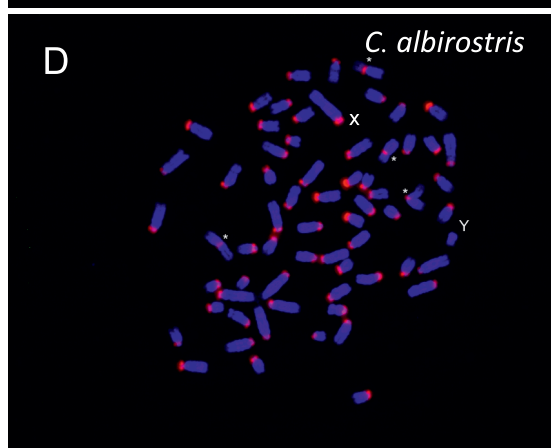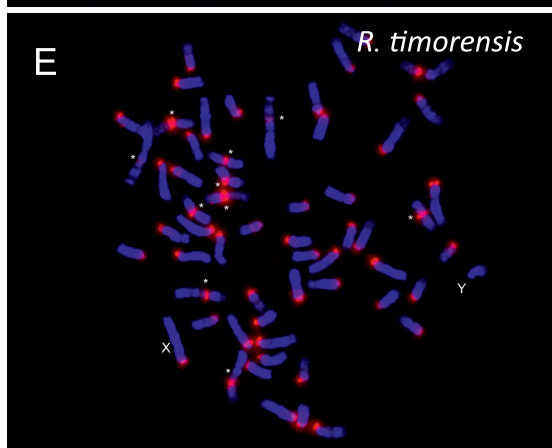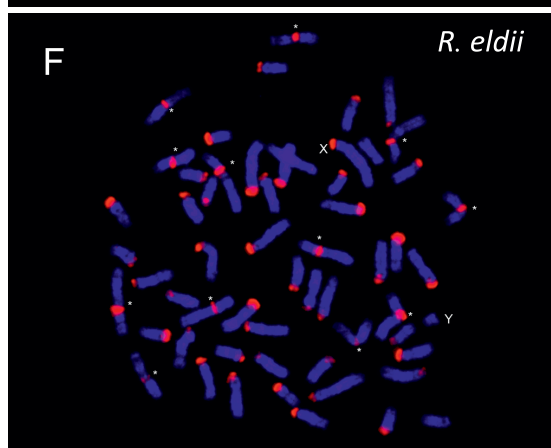

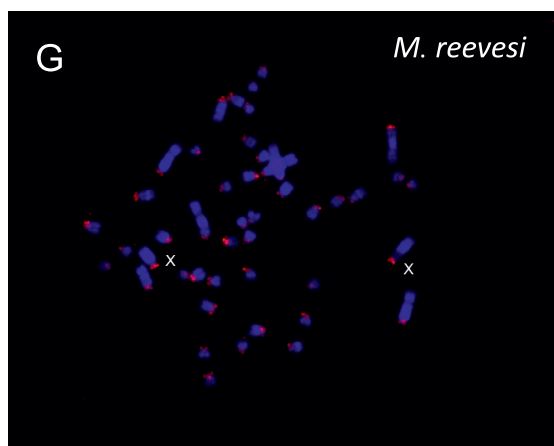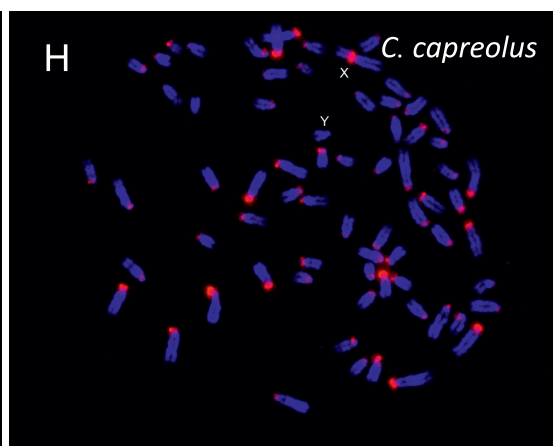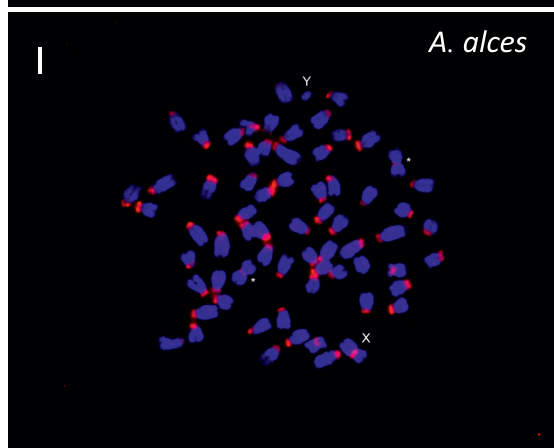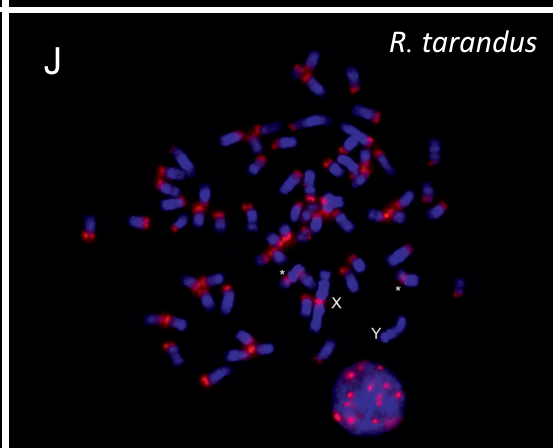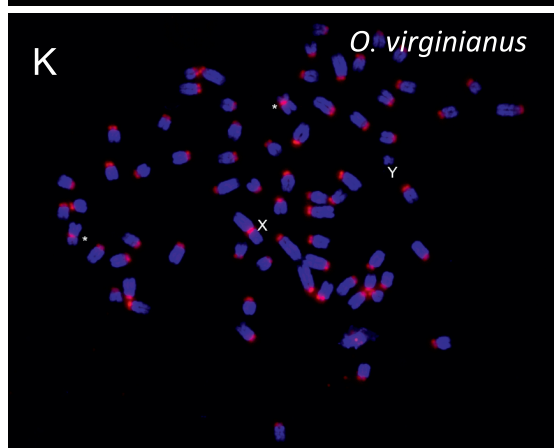

Supplement: s1 [file s1]

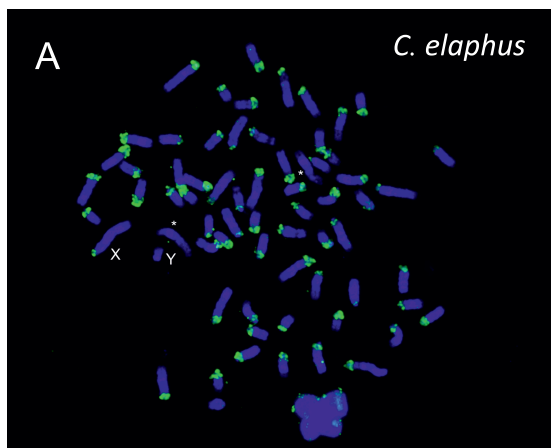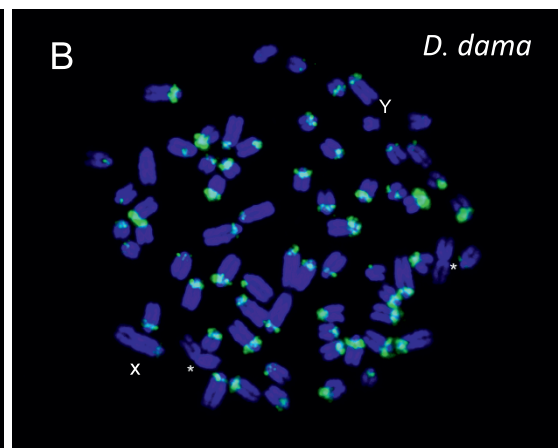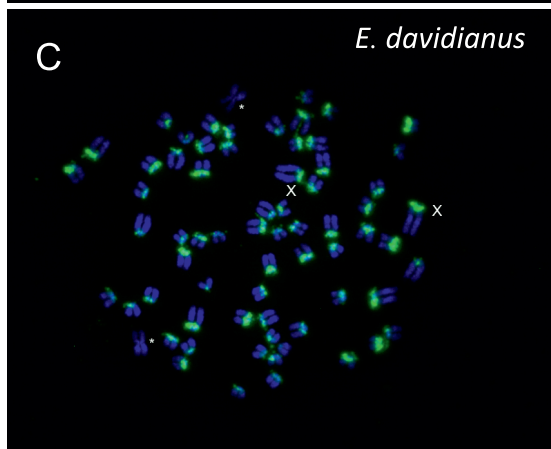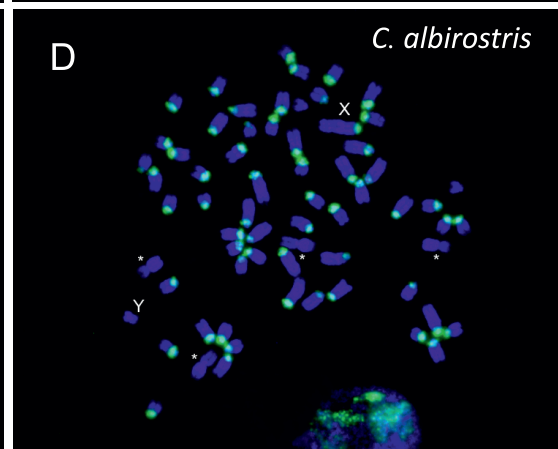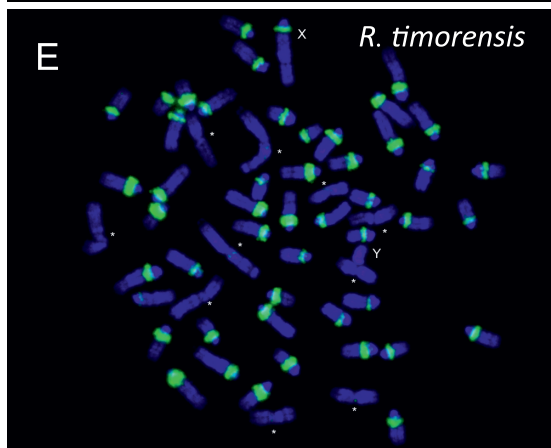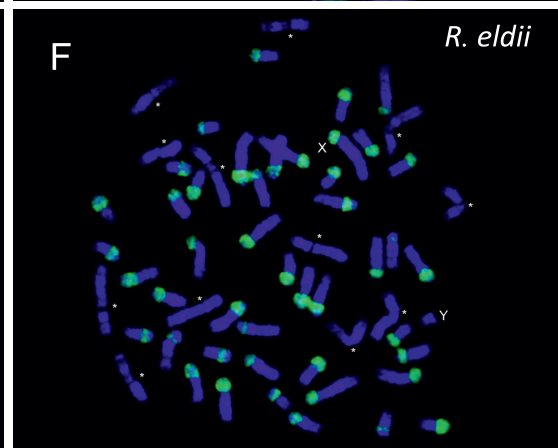

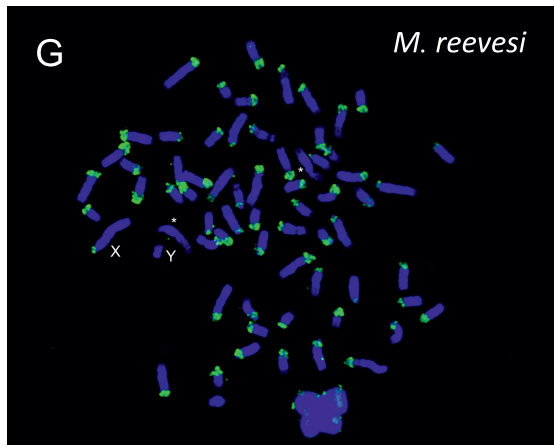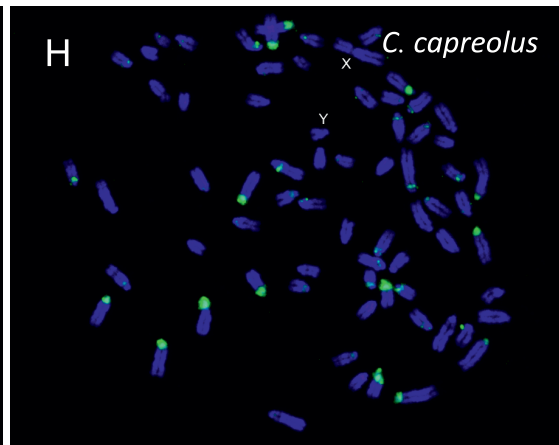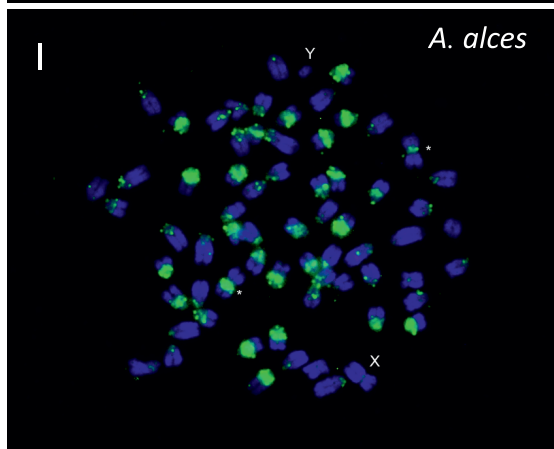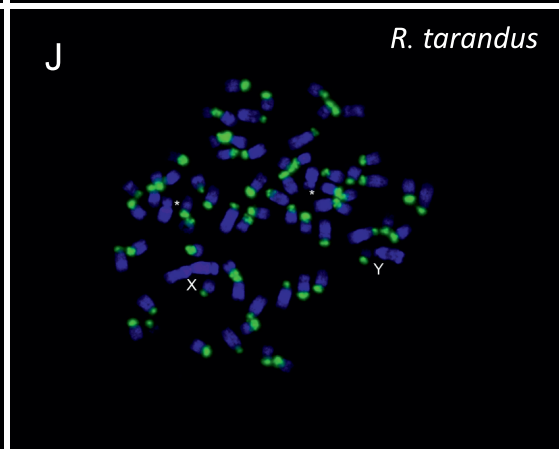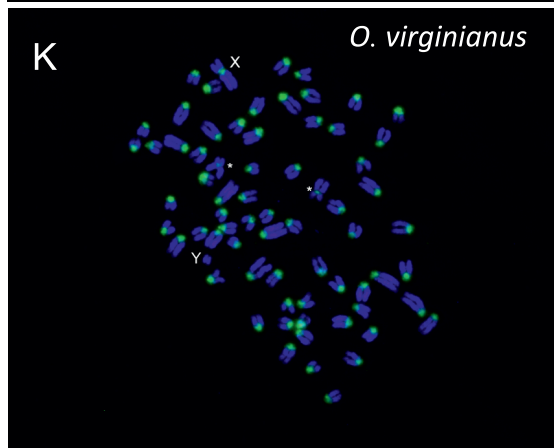

Supplement: s1 [file s1]

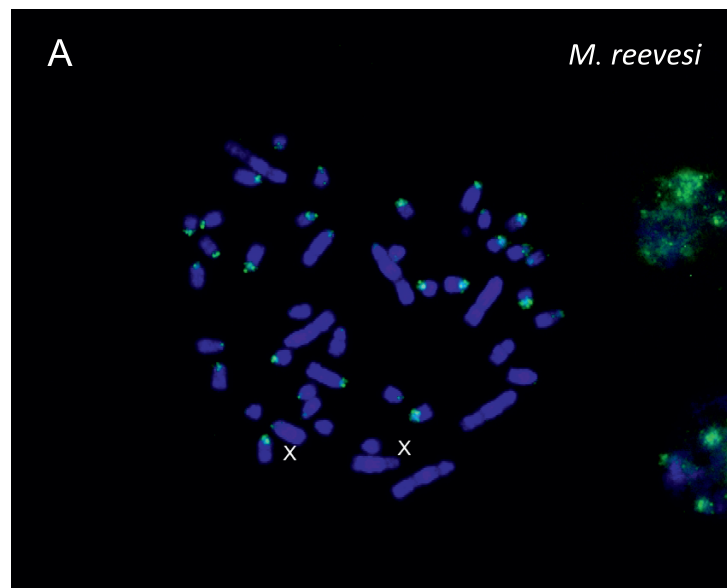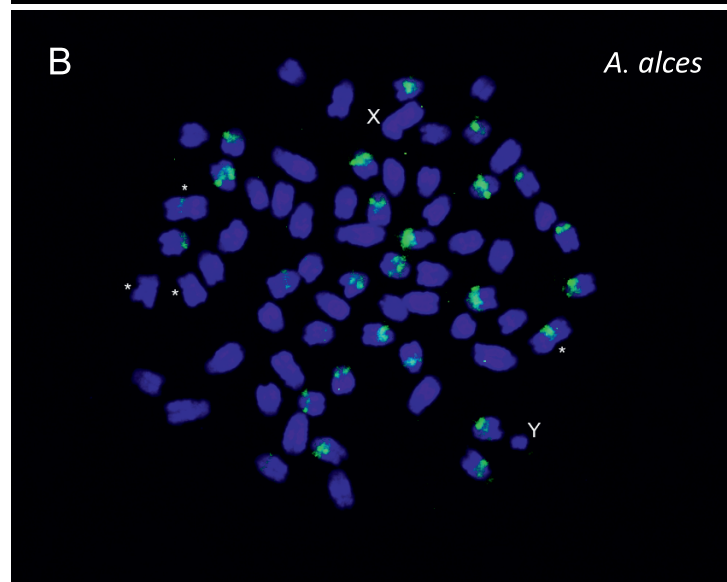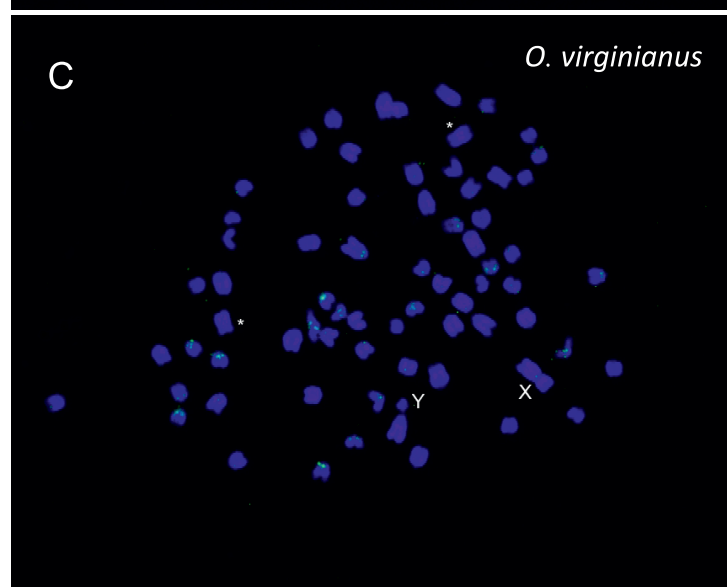

Supplement: s1 [file s1]

**A**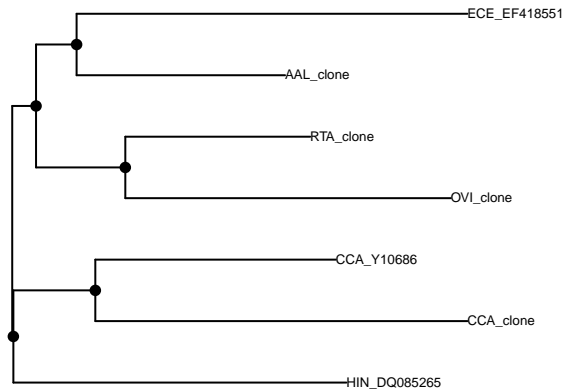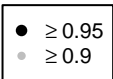**B**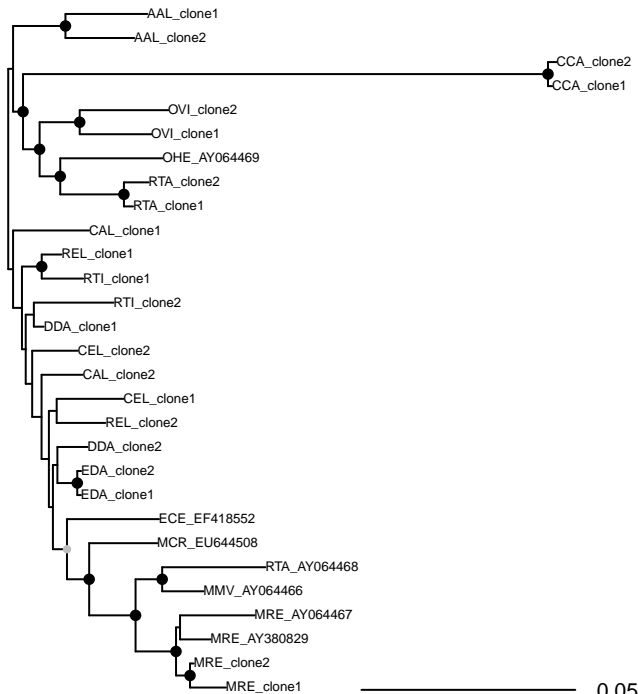

Supplement: s1 [file s1]
